# Supplementary material
Source: publisher figshare collection journal article supplement (https://acs.figshare.com/ndownloader/files/4463833)
Supplement: Supplementary file 1 [file 4463833]

Supporting Information to:

# Cycling of PCBs and HCB in the Surface Ocean-Lower Atmosphere of the Open Pacific

Lin Zhang and Rainer Lohmann\*

Graduate School of Oceanography, University of Rhode Island, Narragansett, RI, 02882, USA

\* corresponding author: Tel: 001-401-874-6612, Fax: 001-401-874-6811,

E-mail: [lohmann@gso.uri.edu](mailto:lohmann@gso.uri.edu)

Total number of pages: 20

## Contents

|                                                                                              |     |
|----------------------------------------------------------------------------------------------|-----|
| Methods .....                                                                                | 1   |
| Sample Processing and Analysis .....                                                         | 2   |
| Quality Assurance/Quality Control .....                                                      | 2   |
| Back Trajectories and Origins of Air Masses .....                                            | 5   |
| Air-Water Gas Exchange Fluxes Calculation: .....                                             | 6   |
| Mass Balance Model: .....                                                                    | 7   |
| Results and Discussion: Interpretation of day-night variations .....                         | 8   |
| Tables .....                                                                                 | 10  |
| SI Table 1 Summary of Sampling and Meteorology Information a) Air; b) Water .....            | 10  |
| SI Table 2 Summary of Concentrations for Different PCB Congeners and HCB a) Air; b) Water. . | 12  |
| SI Table 3 Fugacity Ratios and Air-Water Exchange Fluxes for PCB and HCB .....               | 14  |
| SI Table 4 Net air-water gas exchange fluxes of PCBs and HCB .....                           | 15  |
| SI Table 5 Internally Consistent $K_{aw}$ , $K_{ow}$ , and $K_{oa}$ for PCB and HCB .....    | 16. |
| Figures .....                                                                                | 17  |
| Error! No table of figures entries found. References                                         |     |

## Methods

### **Sample Analysis Method**

PCBs and HCB were analyzed using an Agilent GC 6890N with a DB-5MS capillary column (J&W Scientific) equipped with a Quattro microGC tandem MS (Waters). High purity Helium gas was used as the carrier gas with a flow rate of 1 mL/min. Injection port, GC-MS-MS interface, and ion trap temperature were set to 280°C, 240°C, 180°C, respectively. The oven temperature was programmed as follows: initial temperature 60°C, hold 3.5min, 11°C/min to 180 °C, 3 °C/min to 260 °C, 20°C/min to 300 °C, and hold for 6 min. The ion trap was operated in electron ionization-MS-MS mode. The filament emission current was 150  $\mu$ A.

### **Quality Assurance/Quality Control**

PUFs were pre-extracted twice in dichloromethane (DCM) for 24 h and vacuum-dried. GFFs were baked at 450°C overnight. PUFs and GFFs were handled with nitrile gloves and rinsed pairs of tongs only and stored in solvent-rinsed tin cans and aluminum foils, respectively. They were firmly sealed and stored in freezer until extraction. Samples were extracted in a clean trace laboratory, which received HEPA-filtered air under positive pressure.

There were no major differences in the trace amounts of PCBs and HCB detected between field and laboratory blanks. Samples were therefore corrected using the mean of these two kinds of blanks and method detection limits were derived from the sum of mean blank concentrations and three times the standard deviation of mean blank concentrations.

Major concerns with trace sampling of organic contaminants on-board ship are linked to the contamination of samples from the ship's air during atmospheric sampling and handling (1). Results from our atmospheric sampling show that the R/V Revelle is essentially a clean ship (see results in main text), suggesting that our air and water samples were not affected by on-board contamination.

Extraction and analysis recoveries were routinely monitored using surrogates. Average and standard deviation of recoveries for air and water samples were as follows:  $^{13}\text{C}_{12}$ -PCB 8, 80%±18%, 68%±14%;  $^{13}\text{C}_{12}$ -PCB 28, 74%±16%, 65%±12%;  $^{13}\text{C}_{12}$ -PCB 52, 71%±15%, 64%±11%;  $^{13}\text{C}_{12}$ -PCB 118, 69%±16%, 63%±11%;  $^{13}\text{C}_{12}$ -PCB 138, 72%±18%, 65%±12%;  $^{13}\text{C}_{12}$ -PCB 180, 74%±18%, 63%±11%;  $^{13}\text{C}_{12}$ -PCB 209, 63%±15%, 53%±10%;  $^{13}\text{C}_{12}$ -p, p'-DDT, 67%±14%, 55%±11%.

Breakthrough of PCBs and HCB trapped on two/three PUFs in series was assessed by analyzing the PUFs separately and comparing the concentrations in each PUF.

Breakthrough was not of concern for all analytes except HCB in the air samples. The octanol-air partitioning coefficient ( $K_{oa}$ ) for HCB (2) with temperature correction was used to infer air phase HCB concentrations by assuming equilibrium partitioning of HCB between PUF and air.

- Correction for DOC interference

PCBs and HCB partition to dissolved organic carbon (DOC) and this could lower truly dissolved concentrations ( $C_{sw\_dis}$ ) if the DOC concentration ( $C_{sw\_DOC}$ ) is high. The total concentration collected on PUFs ( $C_T$ ) is the sum of  $C_{sw\_dis}$  and  $C_{sw\_DOC}$ . Freely dissolved PCB and HCB seawater concentrations ( $[PCBs]_{sw\_dis}$ ,  $[HCB]_{sw\_dis}$ ) were calculated by correcting for DOC interference. Most of the PCBs (>90% even for the very hydrophobic hexa-PCBs) and HCB were in the truly dissolved form because of very low  $C_{sw\_DOC}$ .

The truly dissolved concentrations of PCBs and HCB were calculated by correcting the DOC interferences on the total concentrations collected on PUFs. (see SI for more details).

$$f_{sw\_dis} = 1 / (1 + [DOC]K_{DOC}) \quad (1)$$

$$C_{sw\_dis} = C_T * f_{sw\_dis} \quad (2)$$

Where  $f_{sw\_dis}$  is truly dissolved fraction of POPs.

$K_{DOC}$  was estimated from the geometric mean regression equations derived by Burkhard for PCBs and HCB (3):

$$\log K_{DOC} = 0.71 * \log K_{OW} - 0.50 \quad (3)$$

where  $K_{OW}$  is the compound's octanol-water partitioning coefficient.

Surface [DOC] were calculated from regression models using sea surface temperature (SST) (4):

$$[\text{DOC}] = 0.993 * \text{SST} + 52.05 \quad (4)$$

### **Back Trajectories and Origins of Air Masses**

The *R/V Revelle* sailed in the northern hemisphere (NH) trade winds after it left San Diego (air sample No. 2~8), until it reached the intertropical convergence zone (ITCZ). Origins of air sample No. 2~4 were from the west coast of US and Mexico. However, samples No. 5~8 were more likely originated from the coastal seas close to Middle America and had spent more than 10 days over the ocean. South of ITCZ, wind field switched to southern hemisphere (SH) trade winds. Air mass origins of sample No. 9~20 were traced back toward South America, but were above free troposphere (~3000m) 10-day back and descended toward the surface gradually. A more significant switch occurred after sample No. 20, sample No. 21~23, 100~122 were influenced by winds coming from east which were originally from the westerlies south of Australia and New Zealand. For the last few samples (No.123~125), polar easterlies dominated first and then changed to westerlies prior to be sampled.

### **Air-Water Gas Exchange Fluxes ( $F_{a/w}$ , $\text{ng m}^{-2} \text{d}^{-1}$ ) Calculation:**

Air-water gas exchange fluxes ( $F_{a/w}$ ,  $\text{ng m}^{-2} \text{d}^{-1}$ ) were calculated using a modified version of the Deacon boundary layer model as described elsewhere (5). A positive  $F_{a/w}$  value indicates a net flux from the water to the atmosphere:

$$F_{a/w} = v_{POP,a/w} \cdot (C_{sw\_dis} - \frac{C_{gas}}{K_{aw}(T, sal)}) = v_{POP,a/w} \cdot (C_{sw\_dis} - C_{gas}^*) \quad (5)$$

, where  $v_{POP,a/w}$  is the air-water gas exchange mass transfer coefficient (MTC). If water is chosen as the reference phase,  $v_{POP,a/w}$  is always of the form:

$$\frac{1}{v_{POP,a/w}} = \frac{1}{v_{POP,w}} + \frac{1}{v_{POP,a} K_{aw}(T, sal)} \quad (6)$$

The air-side MTC ( $v_{POP,a}$ ) is determined by correlation with the MTC of water vapor ( $v_{H_2O,a}$ ) across the air-side boundary layer (5, 6).

$$v_{POP,a} = \left( \frac{D_{POP,a}}{D_{H_2O,a}} \right)^{0.67} v_{H_2O,a} \quad (7)$$

where  $D_{POP,a}$  and  $D_{H_2O,a}$  are the molecular diffusivities of POPs and  $H_2O$  vapor in air, respectively.  $v_{H_2O,a}$  is determined by the following empirical relationship:

$$v_{H_2O,a} = 0.2 \cdot u_{10} + 0.3 \quad (8)$$

where  $u_{10}$  is the wind speed ( $m s^{-1}$ ) at 10m above the water surface.  $v_{POP,w}$  was obtained using the MTC of  $CO_2$  ( $v_{CO_2,w}$ ) across the water-side boundary layer as reference.

$$v_{POP,w} = \left( \frac{Sc_{POP,w}}{600} \right)^{-a_{Sc}} v_{CO_2,w} \quad (9)$$

where  $Sc_{POP,w}$  is the Schmidt numbers (kinematic viscosity/ molecular diffusivity) for POPs in the water boundary layer, which are strongly sensitive to water temperature because kinematic viscosity and molecular diffusivity are inversely related to temperature. The value of  $a_{sc}$  is 0.67 ( $u_{10} \leq 4.2 \text{ m s}^{-1}$ ) or 0.5 ( $u_{10} \geq 4.2 \text{ m s}^{-1}$ ), and  $v_{CO_2, w}$  is calculated based on the model by Livingstone and Imboden (1993) (7). Schmidt numbers were corrected for each sample's water temperature and  $v_{a/w}$  were calculated for each PCB congener and HCB.

Comparing  $\Sigma$ PCB fluxes with previous studies on different water bodies should be done cautiously (SI Table 4). Different  $K_{aw}$  and different wind speed dependency were used to derive MTC and subsequently quantified different PCB congeners.

### **Mass Balance Model:**

For a better understanding of the PCBs cycling in the SPG, a mass balance model was used to discern what is driving the temporal changes in [PCB] in the atmosphere.

According to previous air mass origins discussions, advective transport is neglected in the mass balance model. Volatilization from surface seawater to air is considered as the only input/ source term of PCBs, while gaseous deposition and OH-radical depletion reaction are the loss terms. The change in  $[PCB]_{air}$  with time can be described as:

$$\begin{aligned} \frac{dC_{gas}}{dt} &= \text{volatilization} - \text{deposition} - \text{OH radical depletion} \\ &= \frac{v_{POP,a/w} \cdot C_{sw\_dis}}{ABL} - \frac{v_{POP,a/w} \cdot C_{gas}}{ABL \cdot K_{aw}} - k_{OH}[OH]C_{gas} \end{aligned} \quad (10)$$

where  $v_{\text{POP}, a/w}$  is about  $1\sim 2 \times 10^{-5} \text{ m s}^{-1}$ , ABL is the ABL height which is about 1000m for these samples,  $K_{a/w}$  is about  $10^{-2}$ ,  $k_{\text{OH}}$  is the lab-derived OH-radical depletion reaction constants for PCBs on the order of a few  $10^{-12} \text{ cm}^3 \text{ molecules}^{-1} \text{ s}^{-1}$  (8), and the average OH radical concentration in the SPG is about  $10^6 \text{ molecules cm}^{-3}$ .

## Results and Discussion

### Interpretation of day-night variations

**Temperature:** several previous land-based studies identified temperature as the dominant factor driving short-term variations in ambient concentrations (26-28). During stable atmospheric conditions, a strong periodic correlation between air concentrations of several different POPs (PCBs, PAHs, and pesticides) and surface temperature were observed, with highest concentration in the early afternoon and lowest at approximately 6am. A sinusoidal wave was fit onto these time dependent variations of atmospheric concentrations (26, 27). Since daily surface temperature fluctuations also follow a sinusoidal wave, this was interpreted that temperature overruled other processes such as OH radical depletion reaction and dominated the diurnal variations of atmospheric concentrations. Seawater temperatures did not fluctuate by more than 2 °C (Fig 4). Thus, temperature alone cannot account for the diurnal fluctuations observed in the SPG.

**Air mass origins:** If the air masses were from different regions during day and night, this could cause higher nighttime  $[\text{PCB}]_{\text{gas}}$  than the daytime concentrations. Back trajectories



showed the air masses for these four diurnal samples were from the same general location and had moved over the S Pacific for at least 10 days before arriving at the ship.

***Air Boundary Layer (ABL) height:*** NOAA's HYSPLIT model did not indicate any variations in the ABL heights. As HCB is more resistant to OH radical attack, it was used as an internal reference compound to help distinguish air mass dilution effects from OH reactions. PCBs and HCB had different short-term variations in ambient concentrations, whereas any air mass dilution effect (due to changes in the ABL height) would affect all molecules similarly.

## Tables

SI Table 1 Summary of Sampling and Meteorology Information a) Air; b) Water

| a)<br>Air No | Start Time       | Stop Time        | Lat   | Long   | Vol<br>(L) | Temp(°C) |      | R.H<br>(%) | W.S<br>(m/s) | W.D<br>(°) | S<br>(PSU) | Fluo<br>(µg/L) |
|--------------|------------------|------------------|-------|--------|------------|----------|------|------------|--------------|------------|------------|----------------|
| 2            | 2006/12/5 17:45  | 2006/12/6 17:30  | 18.8  | -137.3 | 876        | 23.3     | 24.4 | 90.3       | 10.0         | 75         | 34.4       | 0.2            |
| 3            | 2006/12/6 17:45  | 2006/12/7 6:30   | 16.3  | -140.3 | 450        | 24.7     | 25.6 | 92.1       | 9.0          | 73         | 34.0       | 0.3            |
| 4            | 2006/12/7 6:45   | 2006/12/7 17:45  | 14.6  | -142.2 | 421        | 26.5     | 25.9 | 86.3       | 9.5          | 54         | 34.0       | 0.2            |
| 5            | 2006/12/7 18:00  | 2006/12/8 5:45   | 12.9  | -144.0 | 449        | 25.4     | 26.1 | 90.6       | 11.3         | 59         | 33.9       | 0.3            |
| 6            | 2006/12/8 6:00   | 2006/12/8 15:30  | 11.4  | -145.7 | 386        | 26.2     | 26.7 | 87.6       | 11.2         | 56         | 34.0       | 0.2            |
| 7            | 2006/12/8 17:45  | 2006/12/9 5:50   | 9.7   | -147.5 | 482        | 26.4     | 27.1 | 87.2       | 12.6         | 53         | 34.1       | 0.3            |
| 8            | 2006/12/9 6:00   | 2006/12/9 18:00  | 7.8   | -149.5 | 375        | 25.1     | 28.4 | 85.5       | 9.2          | 93         | 33.8       | 0.3            |
| 9            | 2006/12/9 18:15  | 2006/12/10 6:00  | 6.6   | -150.7 | 458        | 26.8     | 28.8 | 84.5       | 8.6          | 69         | 34.0       | 0.7            |
| 10           | 2006/12/10 6:15  | 2006/12/10 17:45 | 4.7   | -152.7 | 485        | 26.8     | 28.9 | 88.9       | 9.4          | 81         | 34.6       | 0.6            |
| 11           | 2006/12/10 18:00 | 2006/12/11 5:50  | 3.2   | -154.2 | 471        | 27.0     | 28.7 | 88.2       | 8.4          | 80         | 35.0       | 1.9            |
| 12           | 2006/12/11 6:00  | 2006/12/11 17:45 | 1.3   | -156.1 | 420        | 27.4     | 28.6 | 84.2       | 6.2          | 82         | 35.1       | 0.9            |
| 14           | 2006/12/11 18:15 | 2006/12/12 5:50  | -0.5  | -157.9 | 442        | 27.3     | 28.5 | 86.0       | 2.0          | 109        | 35.3       | 1.8            |
| 15           | 2006/12/12 6:10  | 2006/12/12 17:45 | -2.2  | -159.3 | 395        | 27.9     | 28.8 | 80.3       | 10.4         | 97         | 35.4       | 0.8            |
| 16           | 2006/12/12 18:00 | 2006/12/13 6:10  | -3.5  | -160.0 | 512        | 28.1     | 29.1 | 77.1       | 11.0         | 101        | 35.5       | 1.8            |
| 17           | 2006/12/13 6:25  | 2006/12/13 17:30 | -5.6  | -163.1 | 429        | 29.8     | N/A  | N/A        | 7.4          | 96         | N/A        | N/A            |
| 18           | 2006/12/13 17:45 | 2006/12/14 5:40  | -7.2  | -164.7 | 462        | 28.7     | N/A  | N/A        | 7.1          | 88         | N/A        | N/A            |
| 19           | 2006/12/14 6:00  | 2006/12/14 18:00 | -8.8  | -166.4 | 408        | 28.9     | N/A  | N/A        | 6.7          | 87         | N/A        | N/A            |
| 20           | 2006/12/14 18:20 | 2006/12/15 5:50  | -10.3 | -168.0 | 420        | 27.9     | N/A  | N/A        | 4.3          | 87         | N/A        | N/A            |
| 21           | 2006/12/15 6:00  | 2006/12/15 17:30 | -11.8 | -169.6 | 454        | 30.0     | N/A  | N/A        | 3.8          | 52         | N/A        | N/A            |
| 23           | 2006/12/15 18:00 | 2006/12/16 5:45  | -13.1 | -171.1 | 401        | 27.6     | N/A  | N/A        | 5.1          | 121        | N/A        | N/A            |
| 100          | 2006/12/18 6:30  | 2006/12/19 6:30  | -17.5 | -169.3 | 804        | 26.4     | N/A  | N/A        | 12.0         | 102        | N/A        | N/A            |
| 101          | 2006/12/19 6:40  | 2006/12/19 18:45 | -20.7 | -167.5 | 447        | 23.8     | N/A  | N/A        | 9.8          | 101        | N/A        | N/A            |
| 102          | 2006/12/19 18:55 | 2006/12/20 6:08  | -23.5 | -166.1 | 412        | 22.6     | 24.4 | 72.2       | 8.2          | 74         | 35.5       | 0.1            |
| 103          | 2006/12/20 6:29  | 2006/12/20 18:44 | -23.9 | -165.7 | 464        | 22.7     | 23.4 | 72.3       | 7.8          | 93         | 35.6       | 0.1            |
| 104          | 2006/12/20 18:49 | 2006/12/21 18:44 | -23.9 | -165.6 | 848        | 22.7     | 23.8 | 76.5       | 7.7          | 93         | 35.6       | 0.1            |
| 105          | 2006/12/21 19:02 | 2006/12/22 7:05  | -24.3 | -164.1 | 515        | 22.6     | 24.0 | 83.0       | 8.3          | 82         | 35.5       | 0.1            |
| 106          | 2006/12/22 7:20  | 2006/12/22 18:27 | -24.8 | -161.7 | 403        | 22.6     | 23.7 | 84.2       | 10.0         | 89         | 35.5       | 0.0            |
| 107          | 2006/12/22 18:35 | 2006/12/24 18:12 | -25.9 | -157.6 | 1695       | 21.6     | 22.7 | 79.9       | 8.3          | 83         | 35.5       | 0.0            |
| 108          | 2006/12/24 18:19 | 2006/12/25 18:00 | -26.7 | -154.2 | 863        | 21.2     | 23.1 | 74.1       | 6.4          | 47         | 35.5       | 0.0            |
| 109          | 2006/12/25 18:07 | 2006/12/26 15:50 | -27.7 | -149.8 | 737        | 21.7     | 22.9 | 78.6       | 8.8          | 52         | 35.4       | 0.0            |
| 110          | 2006/12/28 18:10 | 2006/12/29 8:40  | -26.9 | -140.7 | 464        | 25.2     | 24.1 | N/A        | 4.8          | 31         | 35.5       | 0.0            |
| 111          | 2006/12/29 8:50  | 2006/12/29 18:11 | -26.5 | -138.3 | 161        | 25.3     | 24.3 | N/A        | 5.9          | 76         | 35.3       | 0.0            |
| 112          | 2006/12/30 18:05 | 2006/12/31 17:46 | -27.3 | -134.9 | 755        | 26.3     | 24.1 | N/A        | 5.8          | 18         | 35.4       | 0.0            |
| 113          | 2006/12/31 17:53 | 2007/1/2 17:50   | -28.4 | -130.4 | 1662       | 22.8     | 24.3 | 96.4       | -3.6         | 188        | 35.4       | 0.0            |
| 114          | 2007/1/2 17:58   | 2007/1/3 9:07    | -28.1 | -126.1 | 548        | 23.7     | 24.7 | 85.2       | 1.5          | 86         | 35.7       | 0.0            |
| 115          | 2007/1/3 9:23    | 2007/1/3 17:05   | -27.9 | -123.4 | 290        | 24.2     | 24.9 | 82.2       | 2.5          | 47         | 35.7       | 0.0            |
| 116          | 2007/1/5 6:15    | 2007/1/5 16:44   | -27.9 | -120.0 | 367        | 23.7     | 25.1 | 80.4       | 5.8          | 110        | 35.9       | 0.0            |
| 117          | 2007/1/5 16:50   | 2007/1/7 3:29    | -27.8 | -117.7 | 1186       | 23.1     | 25.0 | 77.9       | 6.2          | 127        | 36.1       | 0.0            |
| 118          | 2007/1/7 3:29    | 2007/1/7 16:56   | -28.9 | -119.2 | 461        | 22.2     | 24.5 | 72.9       | 6.9          | 121        | 35.8       | 0.1            |
| 119          | 2007/1/7 17:03   | 2007/1/8 3:38    | -30.4 | -121.4 | 205        | 21.6     | 23.9 | 88.0       | 8.1          | 112        | 35.5       | 0.1            |
| 120          | 2007/1/8 3:52    | 2007/1/8 17:37   | -31.9 | -123.6 | 468        | 21.2     | 23.1 | 79.4       | 10.6         | 107        | 35.3       | 0.1            |
| 121          | 2007/1/8 17:46   | 2007/1/9 3:50    | -33.5 | -126.0 | 392        | 20.7     | 22.3 | 81.9       | 9.0          | 80         | 34.8       | 0.1            |
| 122          | 2007/1/9 4:05    | 2007/1/9 17:42   | -35.0 | -128.4 | 442        | 20.9     | 21.5 | 78.0       | 4.5          | 65         | 34.6       | 0.2            |
| 123          | 2007/1/10 3:55   | 2007/1/10 17:50  | -37.8 | -132.7 | 489        | 18.1     | 20.5 | 78.4       | 6.3          | 196        | 34.3       | 0.5            |
| 124          | 2007/1/12 4:00   | 2007/1/13 7:38   | -38.9 | -138.0 | 1044       | 16.4     | 18.8 | 81.3       | 8.7          | 259        | 34.2       | 1.0            |
| 125          | 2007/1/14 18:47  | 2007/1/15 6:28   | -40.0 | -143.0 | 436        | 13.2     | 17.1 | 52.6       | 8.2          | 160        | 34.3       | 1.9            |

R.H:Relative Humidity; W.S: Wind Speed; W.D: Wind Direction; Fluo: Fluorescence; N/A: not available



| b)<br>Water<br>No | Start Time       | Stop Time        | Lat   | Long   | Vol (L) | Temp(°C) |       | R.H<br>(%) | W.S<br>(m/s) | W.D<br>(°) | S<br>(PSU) | Fluo (μ<br>g/L) |
|-------------------|------------------|------------------|-------|--------|---------|----------|-------|------------|--------------|------------|------------|-----------------|
|                   |                  |                  |       |        |         | air      | water |            |              |            |            |                 |
| 2                 | 2006/12/3 18:30  | 2006/12/4 8:30   | 25.6  | -128.5 | 669     | 17.3     | 20.5  | 70.2       | 6.8          | 52         | 34.7       | 0.2             |
| 3                 | 2006/12/4 8:30   | 2006/12/4 20:00  | 24.0  | -130.7 | 525     | 19.0     | 21.1  | 67.4       | 6.7          | 65         | 34.7       | 0.2             |
| 4                 | 2006/12/4 20:00  | 2006/12/5 8:30   | 22.4  | -132.8 | 706     | 20.0     | 21.8  | 72.7       | 8.6          | 72         | 34.8       | 0.2             |
| 5                 | 2006/12/5 8:45   | 2006/12/5 23:00  | 20.6  | -135.2 | 477     | 21.7     | 23.1  | 85.3       | 9.3          | 73         | 34.8       | 0.1             |
| 6                 | 2006/12/5 23:00  | 2006/12/6 8:20   | 19.0  | -137.1 | 382     | 23.1     | 24.5  | 91.3       | 10.5         | 75         | 34.4       | 0.3             |
| 7                 | 2006/12/6 8:30   | 2006/12/6 21:30  | 17.5  | -138.9 | 336     | 24.3     | 25.2  | 90.4       | 10.0         | 82         | 34.3       | 0.2             |
| 8                 | 2006/12/6 21:45  | 2006/12/7 9:15   | 15.8  | -140.8 | 362     | 25.0     | 25.7  | 91.4       | 8.5          | 65         | 34.0       | 0.4             |
| 9                 | 2006/12/7 9:30   | 2006/12/7 21:30  | 14.1  | -142.9 | 492     | 26.3     | 26.0  | 87.5       | 10.2         | 54         | 33.9       | 0.3             |
| 10                | 2006/12/7 21:45  | 2006/12/8 9:10   | 12.5  | -144.5 | 722     | 25.6     | 26.2  | 89.1       | 11.4         | 59         | 33.9       | 0.3             |
| 12                | 2006/12/8 9:30   | 2006/12/8 21:15  | 10.7  | -146.4 | 398     | 26.2     | 27.0  | 88.8       | 12.2         | 57         | 34.0       | 0.2             |
| 13                | 2006/12/8 21:20  | 2006/12/9 10:00  | 9.0   | -148.3 | 608     | 26.1     | 27.4  | 88.1       | 12.5         | 59         | 34.0       | 0.3             |
| 14                | 2006/12/9 10:00  | 2006/12/9 21:45  | 7.3   | -150.0 | 336     | 25.7     | 28.6  | 82.6       | 7.2          | 90         | 33.9       | 0.4             |
| 15                | 2006/12/9 22:00  | 2006/12/10 9:30  | 5.9   | -151.5 | 414     | 27.0     | 28.9  | 87.0       | 10.1         | 73         | 34.2       | 0.8             |
| 16                | 2006/12/10 9:45  | 2006/12/10 21:00 | 4.4   | -153.0 | 260     | 26.7     | 28.8  | 89.9       | 8.8          | 78         | 34.7       | 0.9             |
| 17                | 2006/12/10 21:15 | 2006/12/11 8:15  | 2.7   | -154.7 | 243     | 27.2     | 28.6  | 86.3       | 8.2          | 85         | 35.0       | 1.9             |
| 18                | 2006/12/11 8:20  | 2006/12/11 21:30 | 0.9   | -156.5 | 603     | 27.4     | 28.6  | 84.7       | 6.1          | 88         | 35.2       | 1.0             |
| 19                | 2006/12/11 21:45 | 2006/12/12 8:20  | -0.9  | -158.4 | 172     | 27.3     | 28.6  | 85.7       | 8.0          | 109        | 35.4       | 1.7             |
| 20                | 2006/12/12 8:45  | 2006/12/12 20:50 | -2.6  | -159.6 | 384     | 28.0     | 28.9  | 77.9       | 10.8         | 95         | 35.5       | 0.9             |
| 21                | 2006/12/12 21:00 | 2006/12/13 8:35  | -3.7  | -160.0 | 154     | 28.1     | 29.2  | 79.4       | 10.7         | 104        | 35.6       | 1.9             |
| 23                | 2006/12/13 9:30  | 2006/12/13 21:15 | -5.9  | -163.4 | 512     | 30.0     | N/A   | N/A        | 7.1          | 96         | N/A        | N/A             |
| 24                | 2006/12/13 21:35 | 2006/12/14 9:00  | -7.2  | -164.7 | 317     | 28.8     | N/A   | N/A        | 7.6          | 83         | N/A        | N/A             |
| 25                | 2006/12/14 9:15  | 2006/12/14 22:35 | -9.2  | -166.9 | 621     | 29.9     | N/A   | N/A        | 5.9          | 89         | N/A        | N/A             |
| 26                | 2006/12/14 22:55 | 2006/12/15 10:15 | -10.3 | -168.4 | 574     | 28.4     | N/A   | N/A        | 3.8          | 76         | N/A        | N/A             |
| 27                | 2006/12/15 10:30 | 2006/12/15 20:45 | -12.2 | -170.1 | 449     | 30.4     | N/A   | N/A        | 3.2          | 54         | N/A        | N/A             |
| 28                | 2006/12/15 21:00 | 2006/12/16 7:40  | -13.1 | -171.1 | 429     | 27.3     | N/A   | N/A        | 5.7          | 121        | N/A        | N/A             |
| 100               | 2006/12/18 6:56  | 2006/12/19 6:50  | -17.5 | -169.3 | 860     | 26.4     | N/A   | N/A        | 12.0         | 102        | N/A        | N/A             |
| 101               | 2006/12/19 7:00  | 2006/12/19 19:05 | -20.7 | -167.5 | 623     | 23.8     | N/A   | N/A        | 9.8          | 101        | N/A        | N/A             |
| 102               | 2006/12/19 19:15 | 2006/12/20 6:38  | -23.6 | -166.0 | 561     | 22.5     | 24.3  | 72.6       | 8.1          | 75         | 35.5       | 0.1             |
| 103               | 2006/12/20 6:56  | 2006/12/20 18:58 | -23.9 | -165.7 | 621     | 22.7     | 23.4  | 72.2       | 7.8          | 93         | 35.6       | 0.1             |
| 104               | 2006/12/20 19:16 | 2006/12/21 19:12 | -23.9 | -165.6 | 327     | 22.7     | 23.8  | 76.7       | 7.7          | 92         | 35.6       | 0.1             |
| 105               | 2006/12/21 19:25 | 2006/12/22 9:00  | -24.3 | -163.8 | 534     | 22.6     | 23.9  | 83.1       | 8.4          | 84         | 35.5       | 0.1             |
| 106               | 2006/12/22 9:10  | 2006/12/22 18:44 | -24.9 | -161.5 | 513     | 22.6     | 23.8  | 84.1       | 10.3         | 87         | 35.5       | 0.0             |
| 107               | 2006/12/22 18:55 | 2006/12/24 19:01 | -19.9 | -135.3 | 1017    | 21.6     | 22.5  | 73.1       | 10.2         | 77         | 33.8       | 2.7             |
| 108               | 2006/12/24 18:40 | 2006/12/25 18:21 | -26.7 | -154.1 | 914     | 21.1     | 23.1  | 74.0       | 6.4          | 47         | 35.5       | 0.0             |
| 109               | 2006/12/25 18:31 | 2006/12/26 9:05  | -27.6 | -150.4 | 888     | 21.3     | 22.7  | 73.6       | 8.0          | 49         | 35.4       | 0.0             |
| 110               | 2006/12/28 19:31 | 2006/12/29 9:05  | -26.9 | -140.6 | 560     | 25.2     | 24.1  | N/A        | 5.0          | 31         | 35.4       | 0.0             |
| 111               | 2006/12/29 9:20  | 2006/12/29 18:22 | -26.5 | -138.2 | 560     | 25.3     | 24.3  | N/A        | 6.1          | 76         | 35.3       | 0.0             |
| 112               | 2006/12/30 18:24 | 2006/12/31 18:05 | -27.3 | -134.9 | 945     | 26.3     | N/A   | N/A        | 5.8          | 18         | N/A        | N/A             |
| 113               | 2006/12/31 18:14 | 2007/1/1 18:03   | -28.4 | -131.5 | 1027    | 25.5     | 23.4  | N/A        | 5.0          | 344        | 34.7       | -0.5            |
| 114               | 2007/1/2 19:22   | 2007/1/3 9:43    | -28.0 | -125.9 | 385     | 23.6     | 24.8  | 85.1       | 1.7          | 75         | 35.7       | 0.0             |
| 115               | 2007/1/3 9:50    | 2007/1/3 18:18   | -27.9 | -123.4 | 199     | 24.2     | 24.9  | 82.1       | 2.4          | 46         | 35.7       | 0.0             |
| 117               | 2007/1/5 18:10   | 2007/1/7 3:53    | -27.8 | -117.7 | 711     | 23.1     | 25.0  | 77.7       | 6.3          | 128        | 36.1       | 0.0             |
| 118               | 2007/1/7 4:02    | 2007/1/7 17:45   | -28.9 | -119.3 | 400     | 22.2     | 24.5  | 73.0       | 6.7          | 121        | 35.8       | 0.1             |
| 119               | 2007/1/7 18:18   | 2007/1/8 4:09    | -30.5 | -121.6 | 405     | 21.5     | 23.8  | 88.9       | 8.7          | 114        | 35.5       | 0.1             |
| 120               | 2007/1/8 4:09    | 2007/1/8 18:18   | -32.0 | -123.8 | 405     | 21.3     | 23.0  | 79.2       | 10.6         | 106        | 35.3       | 0.1             |
| 121               | 2007/1/8 18:04   | 2007/1/9 4:08    | -33.5 | -126.1 | 241     | 20.7     | 22.3  | 82.0       | 8.9          | 79         | 34.8       | 0.1             |
| 122               | 2007/1/9 4:18    | 2007/1/9 18:17   | -35.1 | -128.4 | 484     | 20.9     | 21.5  | 77.9       | 4.5          | 74         | 34.6       | 0.2             |
| 123               | 2007/1/9 18:28   | 2007/1/10 4:05   | -36.6 | -130.7 | 439     | 20.2     | 21.4  | 85.9       | 5.1          | 311        | 34.5       | 0.5             |
| 124               | 2007/1/10 4:10   | 2007/1/10 17:55  | -37.8 | -132.7 | 401     | 18.0     | 20.5  | 78.0       | 6.3          | 194        | 34.3       | 0.5             |
| 126               | 2007/1/12 18:56  | 2007/1/13 7:15   | -39.2 | -139.5 | 362     | 15.7     | 18.2  | 87.8       | 10.9         | 254        | 34.2       | 1.5             |

**SI Table 2 Summary of Concentrations for Different PCB Congeners and HCB a) Air Phase (pg/m<sup>3</sup>); b) Water Phase (pg/L). PCB congeners not detected were left blank in the table.**

| a)Air | PCB<br>3 | PCB<br>8 | PCB<br>18 | PCB<br>28 | PCB<br>52 | PCB<br>44 | PCB<br>66 | PCB<br>101 | PCB<br>118 | PCB<br>153 | PCB<br>138 | PCB<br>180 | PCB<br>189 | PCB<br>206 | PCB<br>209 | HCB   |
|-------|----------|----------|-----------|-----------|-----------|-----------|-----------|------------|------------|------------|------------|------------|------------|------------|------------|-------|
| 2     | 2.0      | 20.0     | 26.5      | 41.2      | 13.0      | 9.4       | 5.8       | 2.3        | 1.4        | 1.3        |            | 0.2        |            |            |            | 102.8 |
| 3     | 2.6      | 27.6     | 4.8       | 69.1      | 23.9      | 17.2      | 1.8       | 3.2        | 2.5        | 2.5        | 1.8        |            |            | 0.9        |            | 106.7 |
| 4     | 2.5      | 21.7     | 34.9      | 57.2      | 19.3      | 14.9      | 8.6       | 2.8        | 2.5        | 2.7        | 2.0        |            |            |            |            | 93.0  |
| 5     | 1.3      | 12.0     | 15.7      | 29.7      |           |           |           | 1.2        |            | 1.2        |            |            |            |            |            | 60.7  |
| 6     | 1.3      | 11.9     | 19.8      | 33.6      | 11.3      | 7.4       | 6.9       | 6.2        | 1.7        | 1.6        | 1.2        |            |            |            |            | 69.2  |
| 7     | 0.8      | 9.0      | 12.3      | 20.0      | 7.2       | 5.8       | 4.3       | 3.6        | 1.9        | 0.9        |            |            |            |            |            | 79.7  |
| 8     | 1.1      | 9.9      | 11.3      | 16.7      | 7.0       | 5.1       | 3.5       | 3.0        | 1.6        |            |            |            |            |            |            | 58.0  |
| 9     | 0.7      | 8.9      | 15.9      | 28.7      | 1.1       | 7.7       | 5.4       | 4.7        | 1.7        | 1.4        | 1.2        |            |            |            |            | 52.7  |
| 10    | 0.7      | 7.4      | 12.3      | 19.2      | 8.6       | 5.2       | 4.5       | 4.9        | 1.1        | 1.9        | 1.1        |            |            |            | 1.0        | 50.2  |
| 11    | 0.7      | 7.9      | 12.3      | 19.1      | 7.9       | 5.5       | 3.6       | 1.7        |            | 0.9        |            |            |            |            |            | 59.4  |
| 12    | 1.6      | 14.9     | 2.6       | 35.4      | 13.8      | 9.8       | 6.6       | 1.9        |            | 1.8        |            |            |            |            |            | 73.4  |
| 14    | 0.5      | 5.8      | 8.2       | 11.3      | 3.6       | 2.7       | 1.5       | 2.8        |            |            |            |            |            |            |            | 62.9  |
| 15    | 0.4      | 6.7      | 9.5       | 14.4      | 5.8       | 4.8       | 3.4       | 2.6        |            |            |            |            |            |            |            | 53.9  |
| 16    | 0.4      | 3.7      | 5.6       | 8.7       | 3.5       | 2.9       | 1.8       |            |            |            |            |            |            |            |            | 63.8  |
| 17    | 0.4      | 5.0      | 7.5       | 11.9      | 5.2       | 4.4       | 3.2       | 2.4        |            |            |            |            |            |            |            | 63.2  |
| 18    | 0.5      | 5.8      | 7.4       | 13.3      | 8.4       | 6.8       | 8.4       | 2.5        | 3.7        | 4.8        | 3.4        |            |            | 1.7        | 0.2        | 53.1  |
| 19    | 0.6      | 1.4      | 12.2      | 1.3       | 2.9       |           | 0.6       |            |            |            |            |            |            |            |            | 26.1  |
| 20    | 0.7      | 7.8      | 1.2       | 21.7      | 1.6       | 7.5       | 9.8       | 2.3        | 2.0        | 2.8        | 1.5        |            |            |            |            | 47.4  |
| 21    | 1.6      | 11.5     | 15.7      | 3.3       | 11.7      | 9.2       | 6.4       | 1.8        | 2.2        | 2.2        | 1.3        |            |            |            |            | 73.4  |
| 23    | 0.4      | 4.7      | 6.4       | 9.2       | 4.7       | 3.3       | 2.4       | 2.3        | 0.8        |            |            |            |            |            |            | 34.0  |
| 100   | 0.2      | 1.3      | 2.0       | 3.4       | 1.3       | 0.9       | 0.3       | 0.7        |            |            |            | 0.1        |            |            |            | 41.3  |
| 101   | 0.5      | 2.8      | 3.8       | 4.3       | 1.7       | 1.1       |           |            |            |            |            |            |            |            |            | 31.0  |
| 102   | 0.3      | 2.4      | 2.8       | 2.8       | 0.9       | 0.7       |           |            |            |            |            |            |            |            |            | 27.4  |
| 103   | 0.4      | 4.0      | 5.2       | 6.2       | 2.2       | 1.6       | 1.8       | 0.9        |            |            |            |            |            | 0.2        |            | 23.8  |
| 104   | 0.2      | 2.0      | 2.3       | 3.7       | 1.5       | 1.2       | 0.5       | 1.0        | 0.4        |            | 0.5        | 0.3        |            | 0.8        | 0.2        | 24.1  |
| 105   | 0.8      | 1.5      | 1.8       | 1.6       | 0.5       | 0.3       |           |            |            |            |            |            |            |            |            | 43.7  |
| 106   |          | 2.1      | 2.3       | 2.7       | 0.8       | 0.7       | 0.7       |            |            | 0.9        |            |            |            | 0.1        |            | 26.1  |
| 107   | 0.1      | 1.0      | 1.4       | 2.8       | 1.0       | 0.8       | 0.9       | 0.3        |            |            |            | 0.9        |            | 0.2        | 1.0        | 28.9  |
| 108   | 0.3      | 2.3      | 3.4       | 5.5       | 1.6       | 1.6       | 0.7       | 0.6        |            |            |            | 0.2        |            |            | 0.7        | 30.4  |
| 109   | 0.2      | 1.7      | 2.1       | 3.3       | 1.3       | 1.0       | 0.7       | 0.6        |            |            |            |            |            |            |            | 34.7  |
| 110   | 0.2      | 2.5      | 3.0       | 4.5       | 2.7       | 1.5       | 1.4       | 0.9        |            |            |            |            |            |            |            | 31.8  |
| 111   | 0.7      | 6.7      | 6.6       | 7.4       | 3.5       | 2.2       |           |            |            |            |            |            |            |            |            | 45.0  |
| 112   | 0.4      | 2.7      | 4.6       | 7.2       | 2.2       | 1.6       | 1.0       | 0.9        |            |            |            | 0.3        |            |            |            | 40.1  |
| 113   | 0.8      | 1.2      | 2.7       | 6.8       | 2.8       | 2.6       | 1.4       | 0.5        | 0.4        | 0.5        | 0.3        | 0.1        |            |            |            | 21.2  |
| 114   | 0.1      | 2.1      | 2.7       | 3.4       | 1.3       | 0.7       | 0.7       |            |            |            |            |            |            |            |            | 33.9  |
| 115   | 0.4      | 6.7      | 7.6       | 9.5       | 3.8       | 2.6       | 0.9       |            |            |            |            |            |            |            |            |       |
| 116   | 0.2      | 2.3      | 2.6       | 2.4       | 0.9       | 0.9       |           |            |            |            |            |            |            |            |            |       |
| 117   | 0.4      | 1.4      | 1.8       | 2.7       | 1.3       | 0.9       | 0.3       | 0.6        | 0.3        | 0.4        |            | 0.3        |            |            | 0.2        |       |
| 118   | 0.6      | 4.1      | 4.4       | 6.4       | 2.6       | 2.0       | 1.7       | 0.9        |            |            |            |            |            |            |            | 35.5  |
| 119   | 0.6      | 7.9      | 9.4       | 13.4      | 4.3       | 5.0       | 2.9       | 2.6        |            |            |            |            |            |            |            | 17.3  |
| 120   | 0.2      | 2.5      | 2.9       | 4.4       | 2.6       | 1.9       | 0.8       | 2.9        | 2.2        | 1.9        | 2.9        |            |            | 1.3        | 0.3        | 31.1  |
| 121   | 0.5      | 5.6      | 6.2       | 7.4       | 2.6       | 1.9       | 2.1       | 1.3        |            |            |            |            |            |            |            | 36.3  |
| 122   | 0.6      | 8.1      | 1.1       | 17.8      | 7.6       | 5.1       | 3.9       | 3.1        | 1.4        | 1.1        |            |            |            |            |            |       |
| 123   | 0.2      |          | 3.1       | 12.0      | 11.2      | 9.2       | 8.3       | 18.5       | 7.2        | 18.7       | 7.8        | 2.6        |            | 3.7        | 0.7        | 27.9  |
| 124   | 0.5      | 0.5      | 0.6       | 0.7       |           | 0.2       |           |            |            |            |            | 0.8        | 0.6        |            |            | 28.7  |
| 125   | 0.1      | 1.2      | 1.2       | 1.5       |           | 0.4       |           |            |            |            |            |            |            |            |            | 22.0  |



| b)<br>Water | PCB<br>3 | PCB<br>8 | PCB<br>18 | PCB<br>28 | PCB<br>52 | PCB<br>44 | PCB<br>66 | PCB<br>101 | PCB<br>118 | PCB<br>153 | PCB<br>138 | PCB<br>180 | PCB<br>189 | PCB<br>206 | PCB<br>209 | HCB  |
|-------------|----------|----------|-----------|-----------|-----------|-----------|-----------|------------|------------|------------|------------|------------|------------|------------|------------|------|
| 2           | 0.16     | 2.24     | 1.49      | 1.49      | 3.23      | 1.57      | 0.78      | 4.05       | 1.53       | 2.76       | 1.56       |            |            | 0.83       | 0.15       | 1.43 |
| 3           | 0.10     | 2.49     | 1.56      | 1.15      | 2.24      | 1.01      | 0.42      | 2.37       | 1.14       | 1.89       | 1.22       |            |            |            |            | 1.94 |
| 4           | 0.08     | 1.37     | 0.59      | 0.79      | 1.58      | 0.60      | 0.37      | 2.12       | 0.48       | 1.34       | 0.95       |            |            |            |            |      |
| 8           |          | 1.51     | 0.72      |           | 0.52      | 0.23      |           | 0.89       | 0.24       |            | 0.21       |            |            |            |            | 0.80 |
| 10          | 0.15     | 2.17     | 1.32      | 0.73      | 0.80      | 0.34      | 0.20      | 1.39       | 0.76       | 1.18       | 0.72       |            |            |            |            | 0.81 |
| 13          |          | 1.96     | 1.26      | 0.65      |           | 0.20      | 0.22      | 1.40       | 0.72       | 1.19       | 0.58       |            |            |            |            | 0.78 |
| 18          | 0.15     | 1.85     | 0.75      |           |           |           |           |            | 0.24       |            |            |            |            |            |            | 0.49 |
| 20          |          | 1.90     | 0.90      |           |           | 0.09      |           |            | 0.30       |            | 0.08       |            |            |            |            | 0.61 |
| 23          |          | 2.42     | 1.86      | 1.56      | 8.38      | 3.37      | 3.15      | 6.35       | 2.48       | 2.36       | 2.21       |            |            |            |            | 0.50 |
| 25          | 0.18     | 2.92     | 2.01      | 1.36      | 2.56      | 1.20      | 0.20      | 1.68       | 0.71       | 0.87       | 0.67       |            |            |            | 0.14       | 0.50 |
| 26          | 0.13     | 1.93     | 0.96      |           | 0.41      | 0.18      |           |            | 0.56       |            | 0.32       |            |            |            |            |      |
| 100         | 0.10     | 1.65     | 0.79      | 0.46      | 0.23      | 0.12      |           | 0.26       | 0.30       | 0.38       | 0.35       |            |            |            |            |      |
| 101         |          | 2.95     | 2.79      | 2.30      | 1.17      | 0.37      | 0.34      |            | 0.15       |            | 0.17       |            |            |            |            | 0.51 |
| 103         |          | 3.24     | 2.74      | 2.51      | 1.30      | 0.50      |           | 0.55       | 0.20       |            |            |            |            |            |            | 0.58 |
| 105         |          | 1.66     | 0.90      |           |           | 0.01      |           |            |            |            |            |            |            |            |            |      |
| 106         |          | 1.34     | 0.85      | 0.61      |           |           |           |            |            |            |            |            |            |            |            |      |
| 107         |          | 1.18     | 0.54      | 0.43      |           |           |           |            |            |            |            |            |            |            |            | 0.60 |
| 109         | 0.08     | 0.88     | 0.36      |           |           |           |           |            |            |            |            |            |            |            |            | 0.59 |
| 110         |          | 1.65     | 1.00      | 0.69      | 0.30      | 0.12      |           |            |            |            |            |            |            |            |            |      |
| 111         | 0.09     | 1.38     | 1.11      | 0.72      | 0.45      | 0.20      |           |            | 0.41       |            | 0.44       |            | 0.32       |            |            |      |
| 113         | 0.06     | 1.04     | 0.59      | 0.28      |           |           |           |            |            |            |            |            | 0.38       |            |            | 0.73 |
| 118         |          | 0.87     | 0.52      |           |           |           |           |            |            |            | 0.02       |            |            |            |            | 0.92 |
| 119         |          | 0.94     | 0.63      |           | 0.37      |           |           |            |            |            |            |            |            |            |            | 0.64 |
| 120         |          | 1.67     | 1.64      | 1.12      | 0.41      | 0.12      |           |            |            |            | 0.03       |            |            |            |            | 0.67 |
| 121         |          | 0.99     | 0.60      |           |           |           |           |            |            |            |            |            |            |            |            | 1.00 |
| 122         |          | 0.63     |           |           |           |           |           |            |            |            |            |            |            |            |            |      |
| 123         |          | 0.99     | 0.44      |           |           |           |           |            |            |            |            |            |            |            |            |      |

SI Table 3 Summary of Fugacity Ratios (FR) and Air-Water Gas Exchange Fluxes (ng m<sup>-2</sup> d<sup>-1</sup>) for Different PCB Congeners and HCB

| Air Sample No | Lat   | Lon    | PCB3 |       | PCB6 |       | PCB10 |      | PCB20 |       | PCB52 |       | PCB44 |       | PCB66 |       | PCB101 |      | PCB110 |       | PCB153 |      | PCB138 |       | HCB  |       |
|---------------|-------|--------|------|-------|------|-------|-------|------|-------|-------|-------|-------|-------|-------|-------|-------|--------|------|--------|-------|--------|------|--------|-------|------|-------|
|               |       |        | FR   | Flux  | FR   | Flux  | FR    | Flux | FR    | Flux  | FR    | Flux  | FR    | Flux  | FR    | Flux  | FR     | Flux | FR     | Flux  | FR     | Flux | FR     | Flux  | FR   | Flux  |
| 3             | 16.3  | -140.3 |      |       | 1.41 | -1.04 | 0.30  | 0.75 |       |       | 2.02  | -1.49 | 4.62  | -1.30 |       |       | 0.29   | 0.92 | 1.61   | -0.10 |        |      | 0.51   | 0.15  | 2.09 | -2.60 |
| 5             | 12.9  | -144.2 | 0.65 | 0.15  | 0.41 | 3.31  | 0.66  | 1.17 | 2.24  | -2.36 |       |       |       |       |       |       | 0.07   | 2.92 |        |       | 0.08   | 2.29 |        |       | 1.58 | -1.31 |
| 7             | 9.7   | -147.5 |      |       | 0.31 | 4.09  | 0.50  | 1.90 | 1.57  | -1.13 |       |       | 1.54  | -0.32 | 1.08  | -0.05 | 0.18   | 3.06 | 0.34   | 1.05  | 0.06   | 2.80 |        |       | 1.99 | -2.51 |
| 12            | 1.3   | -156.8 | 0.65 | 0.06  | 0.50 | 0.93  | 0.17  | 0.61 |       |       |       |       |       |       |       |       |        |      |        |       |        |      |        |       | 2.69 | -0.83 |
| 15            | -2.2  | -159.3 |      |       | 0.21 | 3.91  | 0.49  | 1.21 |       |       |       |       | 2.59  | -0.36 |       |       |        |      |        |       |        |      |        |       | 1.55 | -0.92 |
| 17            | -5.6  | -163.2 |      |       | 0.12 | 2.89  | 0.10  | 2.03 | 0.34  | 1.37  | 0.03  | 10.30 | 0.06  | 4.00  | 0.05  | 3.00  | 0.02   | 7.37 |        |       |        |      |        |       | 2.13 | -0.70 |
| 19            | -8.8  | -166.4 | 0.20 | 0.14  | 0.03 | 2.63  | 0.27  | 1.32 | 0.04  | 1.17  | 0.05  | 2.00  |       |       | 0.14  | 0.15  |        |      |        |       |        |      |        |       | 0.89 | 0.05  |
| 20            | -10.3 | -168.0 | 0.35 | 0.03  | 0.26 | 0.44  | 0.06  | 0.27 |       |       | 0.20  | 0.09  | 2.12  | -0.06 |       |       |        |      | 0.43   | 0.00  |        |      | 0.24   | 0.06  |      |       |
| 100           | -17.6 | -169.3 | 0.13 | 0.27  | 0.06 | 4.41  | 0.13  | 1.94 | 0.39  | 0.80  | 0.32  | 0.42  | 0.44  | 0.19  |       |       | 0.20   | 0.51 |        |       |        |      |        |       |      |       |
| 101           | -20.8 | -167.5 |      |       | 0.08 | 5.41  | 0.09  | 5.12 | 0.12  | 4.08  | 0.09  | 2.01  | 0.20  | 0.56  |       |       |        |      |        |       |        |      |        |       | 1.43 | -0.47 |
| 103           | 23.9  | 165.7  |      |       | 0.11 | 3.04  | 0.13  | 3.10 | 0.17  | 2.70  | 0.12  | 1.44  | 0.23  | 0.40  |       |       | 0.16   | 0.54 |        |       |        |      |        |       | 1.04 | 0.04  |
| 105           | -24.3 | -164.6 |      |       | 0.08 | 2.38  | 0.13  | 1.22 |       |       |       |       | 2.39  | -0.02 |       |       |        |      |        |       |        |      |        |       |      |       |
| 106           | -24.8 | -161.7 |      |       | 0.14 | 2.39  | 0.18  | 1.46 | 0.29  | 0.91  |       |       |       |       |       |       |        |      |        |       |        |      |        |       |      |       |
| 107           | -25.9 | -157.6 |      |       | 0.00 | 2.13  | 0.10  | 0.87 | 0.47  | 0.45  |       |       |       |       |       |       |        |      |        |       |        |      |        |       | 1.32 | -0.42 |
| 109           | -27.7 | -149.0 | 0.30 | 0.00  | 0.10 | 0.99  | 0.42  | 0.29 |       |       |       |       |       |       |       |       |        |      |        |       |        |      |        |       | 1.50 | -0.51 |
| 110           | -26.9 | -140.7 |      |       | 0.13 | 0.72  | 0.19  | 0.39 | 0.42  | 0.19  | 0.64  | 0.05  | 0.02  | 0.01  |       |       |        |      |        |       |        |      |        |       |      |       |
| 111           | -26.5 | -130.3 | 0.67 | 0.03  | 0.41 | 0.70  | 0.38  | 0.59 | 0.65  | 0.22  | 0.53  | 0.17  | 0.75  | 0.04  |       |       |        |      |        |       |        |      |        |       |      |       |
| 113           | -28.4 | -130.4 | 1.18 | -0.01 | 0.11 | 0.46  | 0.32  | 0.19 | 1.64  | -0.09 |       |       |       |       |       |       |        |      |        |       |        |      |        |       |      |       |
| 118           | -28.9 | -119.2 |      |       | 0.40 | 0.56  | 0.52  | 0.27 |       |       |       |       |       |       |       |       |        |      |        |       |        |      |        |       | 0.91 | 0.09  |
| 119           | -30.4 | -121.4 |      |       | 0.75 | 0.39  | 0.97  | 0.03 |       |       | 0.81  | 0.11  |       |       |       |       |        |      |        |       |        |      |        |       | 0.67 | 0.36  |
| 120           | -31.9 | -123.6 |      |       | 0.14 | 3.01  | 0.12  | 3.04 | 0.27  | 1.73  | 0.40  | 0.42  | 1.10  | -0.04 |       |       |        |      |        |       |        |      | 9.05   | -0.30 | 1.22 | -0.34 |
| 121           | 33.5  | 126.3  |      |       | 0.56 | 0.68  | 0.76  | 0.29 |       |       |       |       |       |       |       |       |        |      |        |       |        |      |        |       | 1.00 | 0.01  |
| 122           | -35.4 | -128.4 |      |       | 1.35 | -0.07 |       |      |       |       |       |       |       |       |       |       |        |      |        |       |        |      |        |       |      |       |

**SI Table 4 Net air-water gas exchange fluxes of PCBs and HCB (ng m<sup>-2</sup> d<sup>-1</sup>)**

| Area                                | Time                | Fluxes <sup>a</sup>                       | Reference       |
|-------------------------------------|---------------------|-------------------------------------------|-----------------|
| <b>PCBs</b>                         |                     |                                           |                 |
|                                     |                     | <b>Freshwater</b>                         |                 |
| Lake Superior                       | 1986, Aug           | 19~141( $\Sigma_{35}$ PCB)                | 9               |
|                                     | 1988,Jul; 1990, Aug | 35~110( $\Sigma_{80}$ PCB)                | 10              |
|                                     | 1992, May           | -16~-40 ( $\Sigma_{80}$ PCB)              |                 |
| Lake Michigan                       | 1991, Sep           | 23.8~223 ( $\Sigma_{77}$ PCB)             | 11              |
|                                     | 1993, Jun~Oct       | 13~1300 ( $\Sigma_{85}$ PCB)              | 12              |
|                                     | 1994, May           | -20~31 ( $\Sigma_{25}$ PCB)               | 13              |
|                                     | 1994, Jul           | -13~30 ( $\Sigma_{25}$ PCB)               |                 |
|                                     | 1995, Jan           | 15~59 ( $\Sigma_{25}$ PCB)                |                 |
|                                     |                     | <b>Coastal Area</b>                       |                 |
| New York /New Jersey Harbor Esturay | 1999, Jul           | 400~2100 ( $\Sigma_{15}$ PCB)             | 14              |
| Chesapeake Bay                      | 1993,Annual         | -63~800 ( $\Sigma_{46}$ PCB)              | 15              |
|                                     |                     | <b>Sea</b>                                |                 |
| Arabian Sea and Bay of Bengal       | 1989~1990, Nov~ Mar | -20~20 ( $\Sigma_{36}$ PCB)               | 16 <sup>b</sup> |
| Baltic Sea                          | 1999, Mar, May,Jun  | Equilibrium                               | 17              |
| Mediterranean                       | 1989, Nov~1990, Mar | -40~3 ( $\Sigma_{36}$ PCB)                | 16 <sup>b</sup> |
|                                     | 1997, 2002          | 2.6 ( $\Sigma_{18}$ PCB)                  | 18              |
| Bering Sea                          | 1990, Jun~Aug       | -120~0 ( $\Sigma_{36}$ PCB)               | 16 <sup>b</sup> |
| Chukchi Sea                         | 1990, Jun~Aug       | -60~-40 ( $\Sigma_{36}$ PCB)              | 16 <sup>b</sup> |
| Gulf of Alaska                      | 1990, Jun~Aug       | -60~0 ( $\Sigma_{36}$ PCB)                | 16 <sup>b</sup> |
|                                     |                     | <b>Open Ocean</b>                         |                 |
| E. Indian Ocean                     | 1989, Apr~Jun       | 5~40 ( $\Sigma_{36}$ PCB)                 | 16 <sup>b</sup> |
| Southern Ocean                      | 1989, Apr~Jun       | -20~0 ( $\Sigma_{36}$ PCB)                | 16 <sup>b</sup> |
| N. Atlantic                         | 1989~1990, Nov~ Mar | -60~10( $\Sigma_{36}$ PCB)                | 16 <sup>b</sup> |
| Atlantic                            | 2005, Oct~Nov       | -7~0.02 ( $\Sigma_5$ PCB)                 | 19              |
| Northern North Atlantic and Arctic  | 2004,Jun~Aug        | -4~0.08 ( $\Sigma_4$ PCB)                 | 20              |
| Northern N. Pacific Ocean           | 1989, Jun~Jul       | -100~10 ( $\Sigma_{36}$ PCB)              | 16 <sup>b</sup> |
| N. Pacific                          | 1989, Nov~1990, Mar | -40~40 ( $\Sigma_{36}$ PCB)               | 16 <sup>b</sup> |
| Southern N. Pacific and S. Pacific  | 2006, Dec~2007, Jan | -0.4~30 ( $\Sigma_{15}$ PCB) <sup>c</sup> | this study      |
| <b>HCB</b>                          |                     |                                           |                 |
| Lake Baikal                         | 1991, Jun           | 32                                        | 21              |
| Arctic                              | 1993, Annual        | Equilibrium                               | 22              |
| Northern North Atlantic and Arctic  | 2004, Oct           | Equilibrium                               | 23              |
| Southern N. Pacific and S. Pacific  | 2006, Dec~2007, Jan | Equilibrium                               | this study      |

<sup>a</sup>Positive number means volatilization, negative number means deposition.

<sup>b</sup>All flux numbers in Iwata et al 1993 were case 1 from Fig 11.

<sup>c</sup>Fluxes only include numbers with ascertained air-water gas exchange directions (Fugacity Ratios >3.1

**SI Table 5 Internally Consistent Air-Water ( $K_{aw}$ ), Octanol-Water( $K_{ow}$ ), and Octanol-Air ( $K_{oa}$ ) Partitioning Constants as well as Corresponding Internal Energy ( $U_{aw}$ ,  $U_{ow}$ ,  $U_{oa}$ ) at 25°C for selected PCB Congeners and HCB**

|           | $\log K_{ow}$     | $\log K_{aw}$      | $\Delta U_{aw}$<br>(kJ/mol) |
|-----------|-------------------|--------------------|-----------------------------|
| PCB3      | 4.71              | -2.06              | 52.9                        |
| PCB8      | 5.29              | -2.06              | 54.9                        |
| PCB18     | 5.47 <sup>a</sup> | -1.93 <sup>b</sup> | 51.8 <sup>b</sup>           |
| PCB28     | 5.92              | -1.93              | 51.8                        |
| PCB52     | 6.26              | -1.96 <sup>c</sup> | 53.8 <sup>c</sup>           |
| PCB44     | 6.06 <sup>a</sup> | -1.96 <sup>c</sup> | 53.8 <sup>c</sup>           |
| PCB66     | 6.58 <sup>a</sup> | -1.96 <sup>c</sup> | 53.8 <sup>c</sup>           |
| PCB101    | 6.76              | -2.08              | 65.2                        |
| PCB118    | 7.08              | -2.36              | 65.2                        |
| PCB153    | 7.31              | -2.13              | 68.2                        |
| PCB138    | 7.70              | -1.97              | 64.7                        |
| PCB180    | 7.66              | -2.51              | 69                          |
| PCB189    | 8.33 <sup>a</sup> |                    |                             |
| PCB206    | 8.77 <sup>a</sup> |                    |                             |
| PCB209    | 8.87 <sup>a</sup> |                    |                             |
| Reference |                   | (24)               |                             |

<sup>a</sup> values from Schenker et al (24), missing values derived from a linear relationship with Hawker and Connell (25),

<sup>b</sup> PCB-28 values used; <sup>c</sup> PCB-52 values used

|           | $\log K_{ow}$ | $\log K_{aw}$ | $\Delta U_{aw}$<br>(kJ/mol) | $\log K_{oa}$ | $\Delta U_{oa}$<br>(kJ/mol) |
|-----------|---------------|---------------|-----------------------------|---------------|-----------------------------|
| HCB       | 5.61          | -1.51         | 51.9                        | 7.12          | -75.9                       |
| Reference |               |               | (2)                         |               |                             |



## Figures

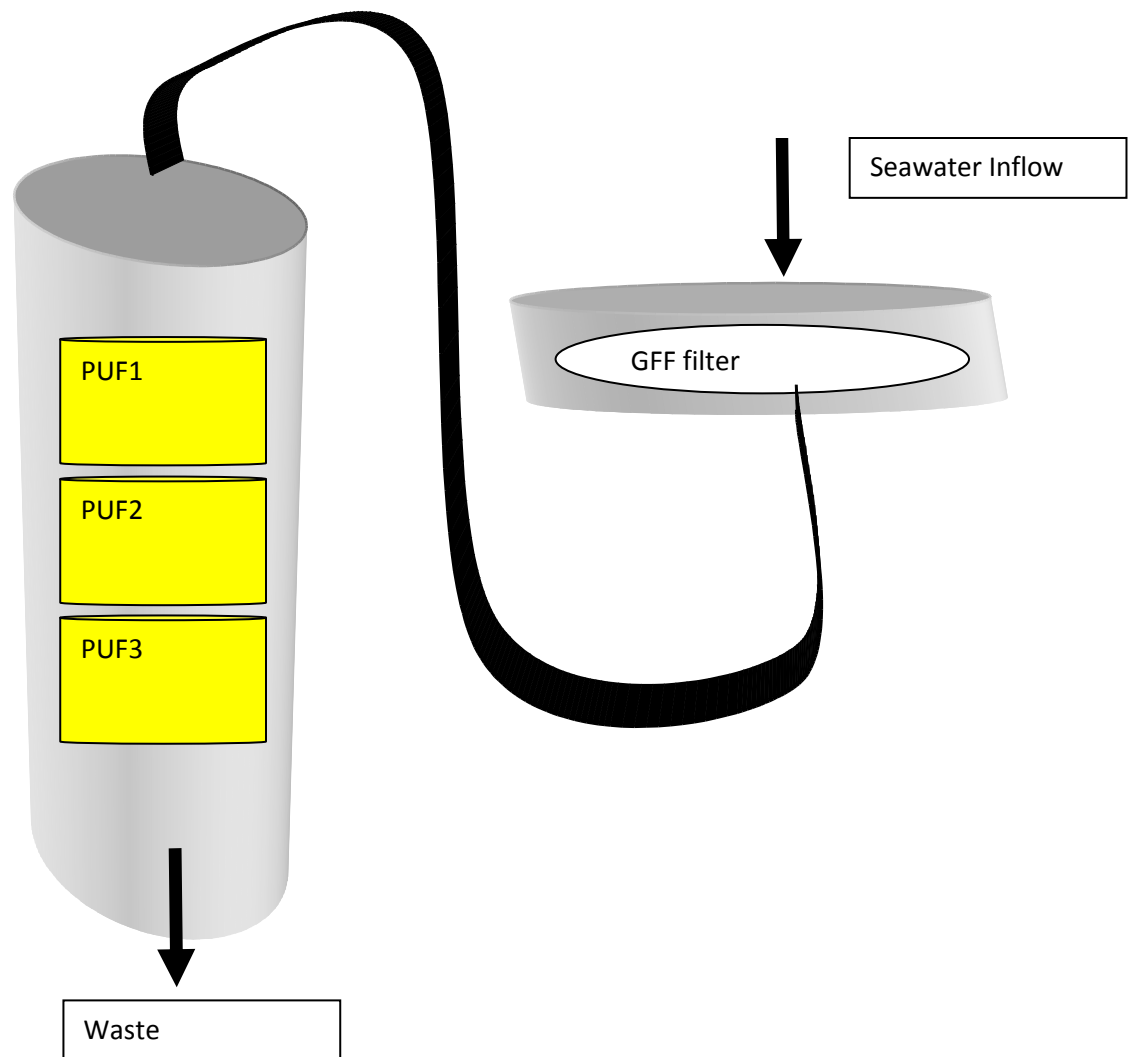

SI Figure 1 Sampling scheme for water samples

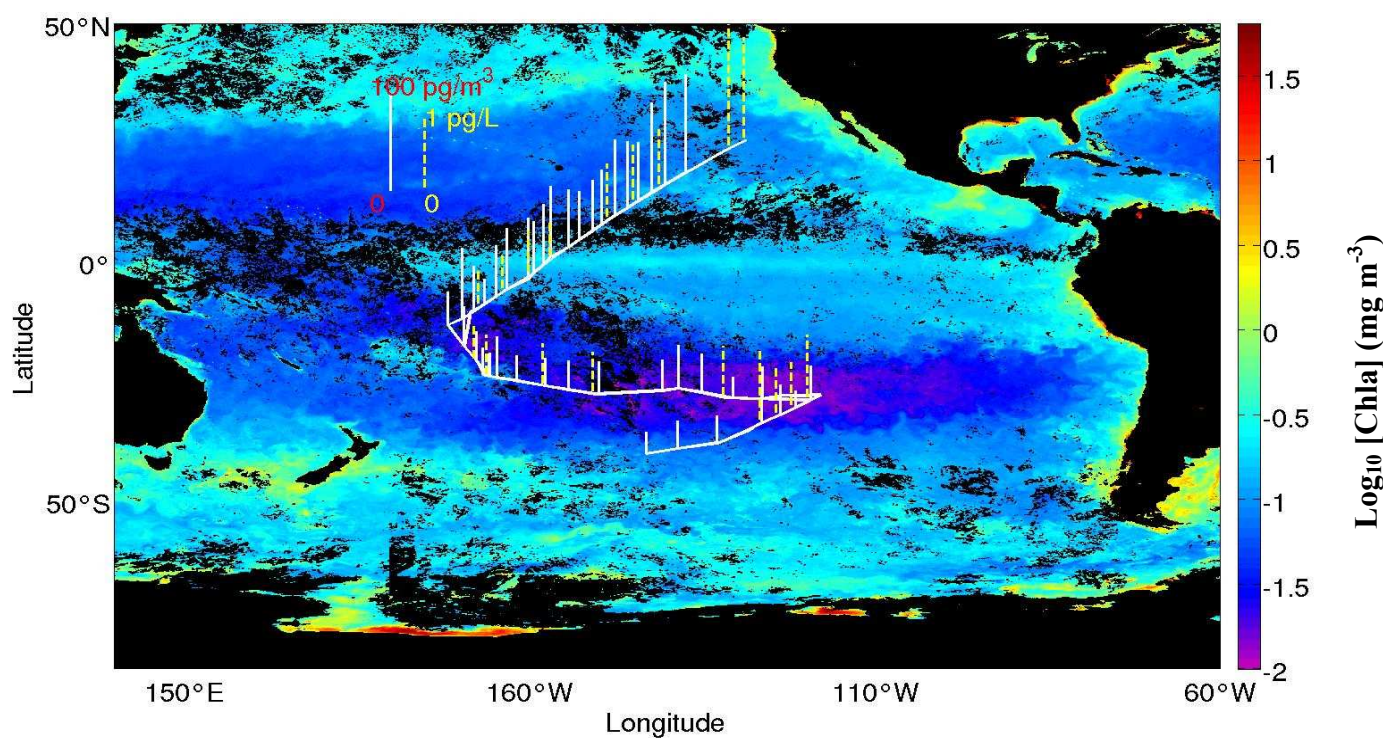

SI Figure 2 Air HCB Concentrations (White Bar), Water HCB Concentrations (Yellow Dash Lines), plotted on Aqua MODIS Jan-2007 Chlorophyll Concentration Map in the Pacific

## References

1. Lohmann, R.; Jaward, F.M.; Durham, L.; Barber, J.L.; Ockenden, W.; Jones, K.C.; Bruhn, R.; Lakaschus, S.; Dachs, J.; Booij, K. Potential contamination of shipboard air samples by diffusive emissions of PCBs and other organic pollutants: implications and solutions. *Environ. Sci. Technol.* **2004**, *38*, 3965-3970.
2. Shen, L. and Wania, F. Compilation, Evaluation, and Selection of Physical– Chemical Property Data for Organochlorine Pesticides. *J. Chem. Eng. Data* **2005**, *50*, 742-768.
3. Burkhard, L.P. Estimating dissolved organic carbon partition coefficients for nonionic organic chemicals. *Environ. Sci. Technol.* **2000**, *34*, 4663-4668.
4. Siegel, D.A.; Maritorena, S.; Nelson, N.B.; Hansell, D.A.; Lorenzi-Kayser, M. Global distribution and dynamics of colored dissolved and detrital organic materials. *J. Geophys. Res.* **2002**, *107*, 3228.
5. Schwarzenbach, R.P.; Gschwend, P.M.; Imboden, D.M. *Environmental Organic Chemistry, Second Edition*. John Wiley & Sons, Inc.: Hoboken, NJ, USA, 2002; pp. 1328.
6. Mackay, D. and Yeun, A.T.K. Mass transfer coefficient correlations for volatilization of organic solutes from water. *Environ. Sci. Technol.* **1983**, *17*, 211-217.
7. Livingstone, D.M. and Imboden, D.M. The non-linear influence of wind-speed variability on gas transfer in lakes. *Tellus B* **1993**, *45*, 275-295.
8. Anderson, P.N. and Hites, R.A. OH radical reactions: The major removal pathway for polychlorinated biphenyls from the atmosphere. *Environmental Science & Technology* **1996**, *3*, 1756-1763.
9. Baker, J.E. and Eisenreich, S.J. Concentrations and fluxes of polycyclic aromatic hydrocarbons and polychlorinated biphenyls across the air-water interface of Lake Superior. *Environ. Sci. Technol.* **1990**, *24*, 342-352.
10. Hornbuckle, K.C.; Jeremiason, J.D.; Sweet, C.W.; Eisenreich, S.J. Seasonal variations in air-water exchange of polychlorinated biphenyls in Lake Superior. *Environ. Sci. Technol.* **1994**, *28*, 1491-1501.
11. Hornbuckle, K.C.; Sweet, C.W.; Pearson, R.F.; Swackhamer, D.L.; Eisenreich, S.J. Assessing annual water-air fluxes of polychlorinated biphenyls in Lake Michigan. *Environ. Sci. Technol.* **1995**, *29*, 869-877.
12. Achman, D.R.; Hornbuckle, K.C.; Eisenreich, S.J. Volatilization of polychlorinated biphenyls from Green Bay, Lake Michigan. *Environ. Sci. Technol.* **1993**, *27*, 75-87.
13. Zhang, H.; Eisenreich, S.J.; Franz, T.R.; Baker, J.E.; Offenbergs, J.H. Evidence for increased gaseous PCB fluxes to Lake Michigan from Chicago. *Environ. Sci. Technol.* **1999**, *33*, 2129-2137.
14. Totten, L.A.; Brunciak, P.A.; Gigliotti, C.L.; Dachs, J.; Glenn IV, T.R.; Nelson, E.D.; Eisenreich, S.J. Dynamic Air– Water Exchange of Polychlorinated Biphenyls in the New York– New Jersey Harbor Estuary. *Environ. Sci. Technol.* **2001**, *35*, 3834-3840.

15. Nelson, E.D.; McConnell, L.L.; Baker, J.E. Diffusive Exchange of Gaseous Polycyclic Aromatic Hydrocarbons and Polychlorinated Biphenyls Across the Air– Water Interface of the Chesapeake Bay. *Environ. Sci. Technol.* **1998**, *32*, 912-919.
16. Iwata, H.; Tanabe, S.; Sakai, N.; Tatsukawa, R. Distribution of persistent organochlorines in the oceanic air and surface seawater and the role of ocean on their global transport and fate. *Environ. Sci. Technol.* **1993**, *27*, 1080-1098.
17. Bruhn, R.; Lakaschus, S.; McLachlan, M.S. Air/sea gas exchange of PCBs in the southern Baltic Sea. *Atmos. Environ.* **2003**, *37*, 3445-3454.
18. Mandalakis, M.; Apostolaki, M.; Stephanou, E.G.; Stavrakakis, S. Mass budget and dynamics of polychlorinated biphenyls in the eastern Mediterranean Sea. *Global Biogeochem. Cycles* **2005**, *19*, GB3018, 1-16.
19. Gioia, R.; Nizzetto, L.; Lohmann, R.; Dachs, J.; Temme, C.; Jones, K.C. Polychlorinated Biphenyls (PCBs) in Air and Seawater of the Atlantic Ocean: Sources, Trends and Processes. *Environ. Sci. Technol.* **2008**, *42*, 1416-1422.
20. Gioia, R.; Lohmann, R.; Dachs, J.; Temme, C.; Lakaschus, S.; Schulz-Bull, D.; Hand, I.; Jones, K.C. Polychlorinated biphenyls in air and water of the North Atlantic and Arctic Ocean. *Journal of Geophysical Research-Atmospheres* **2008**, *113*, D19302.
21. McConnell, L.L.; Kucklick, J.R.; Bidleman, T.F.; Ivanov, G.P.; Chernyak, S.M. Air– Water Gas Exchange of Organochlorine Compounds in Lake Baikal, Russia. *Environ. Sci. Technol.* **1996**, *30*, 2975-2983.
22. Hargrave, B.T.; Barrie, L.A.; Bidleman, T.F.; Welchs, H.E. Seasonality in exchange of organochlorines between Arctic air and seawater. *Environ. Sci. Technol.* **1997**, *31*, 3258-3266.
23. Lohmann, R.; Gioia, R.; Jones, K.C.; Nizzetto, L.; Temme, C.; Xie, Z.; Schulz-Bull, D.; Hand, I.; Morgan, E.; Jantunen, L. Organochlorine Pesticides and PAHs in the Surface Water and Atmosphere of the North Atlantic and Arctic Ocean. *Environ. Sci. Technol.* **2009**, *43*, 5633-5639.
24. Schenker, U.; MacLeod, M.; Scheringer, M.; Hungerbuhler, K. Improving data quality for environmental fate models: A least-squares adjustment procedure for harmonizing physicochemical properties of organic compounds. *Environ. Sci. Technol.* **2005**, *39*, 8434-8441.
25. Hawker, D.W. and Connell, D.W. Octanol-water partition coefficients of polychlorinated biphenyl congeners. *Environ. Sci. Technol.* **1988**, *22*, 382-387.
26. Wallace, J.C. and Hites, R.A. Diurnal variations in atmospheric concentrations of polychlorinated biphenyls and endosulfan: Implications for sampling protocols. *Environ. Sci. Technol.* **1996**, *30*, 444-446.
27. Lee, R.G.M.; Hung, H.; Mackay, D.; Jones, K.C. Measurement and modeling of the diurnal cycling of atmospheric PCBs and PAHs. *Environ. Sci. Technol.* **1998**, *32*, 2172-2179.
28. Sofuoglu, A.; Cetin, E.; Bozacioglu, S.S.; Sener, G.D.; Odabasi, M. Short-term variation in ambient concentrations and gas/particle partitioning of organochlorine pesticides in Izmir, Turkey. *Atmos. Environ.* **2004**, *38*, 4483-4493.
